# Supplementary material for: Kinetics of MSC-based enzyme therapy for immunoregulation
Source: Springer Nature journal article supplement (doi:10.1186/s12967-019-2000-6), 2019-08-13
Supplement: MOESM1 [file 17064060]

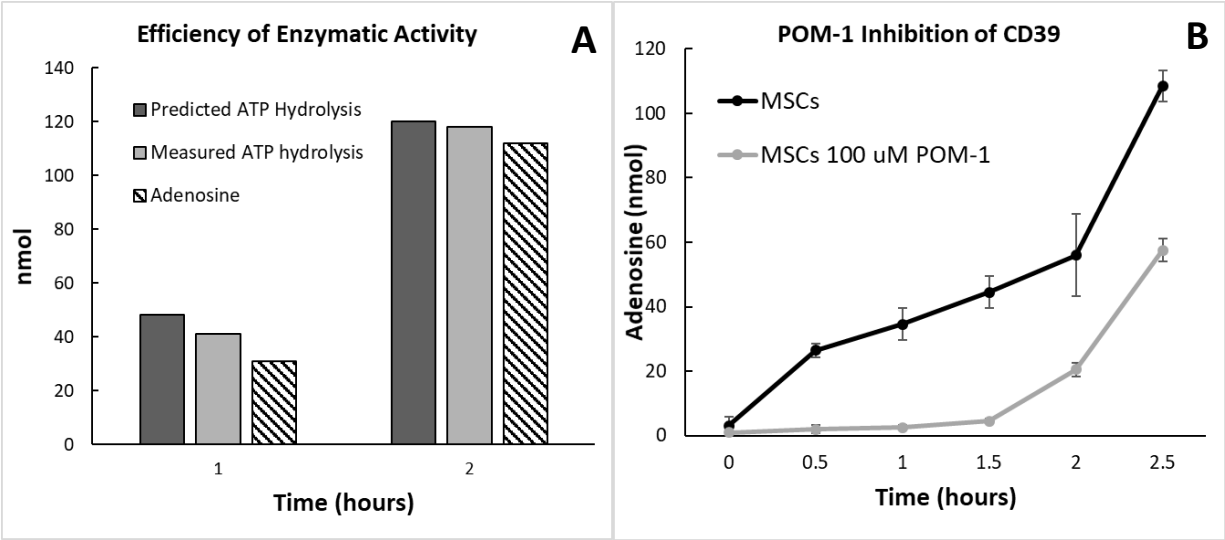

Figure S1

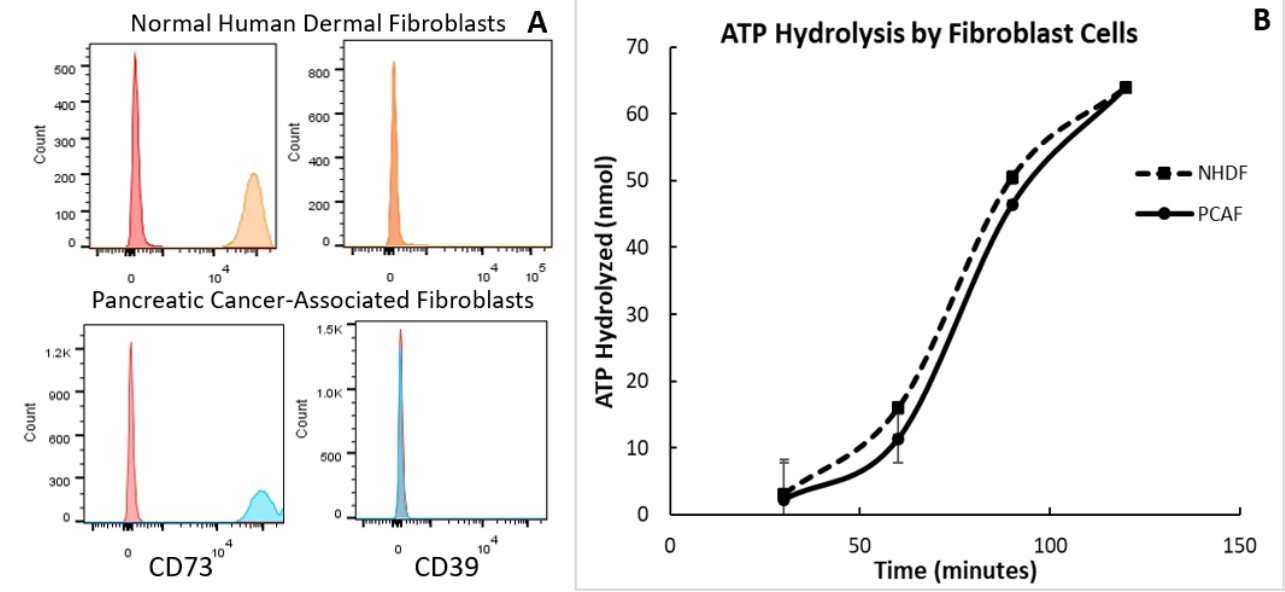

Figure S2
